# Supplementary material for: Antibody Responses during Hepatitis B Viral Infection
Source: PubMed Central journal article supplement (PMC4117427; doi:10.1371/journal.pcbi.1003730), 2014-07-31
Supplement: pcbi.1003730.s006.pdf [file pcbi.1003730.s006.pdf]

# Antibody responses during hepatitis B viral infection - Text S1

Stanca M. Ciupe<sup>\*,¶</sup>, Ruy M. Ribeiro<sup>†</sup>, Alan S. Perelson<sup>†</sup>

We have shown analytically that when (22) holds, model (7) exhibits bi-stability between the clearance and chronic steady states,  $S_4$  and  $S_5$ , respectively. We investigated numerically the individual contributions of  $r_A$ ,  $\theta$  and  $A_0$  to the virus long-term dynamics. Since some parameters have synergistic/antagonistic effects, we derived long-term dynamics of  $V$  when two of model (7)'s parameters are varied. As seen in Fig. S1,  $r_A$  and  $p_A$  complement each other, with virus clearance being maintained when the decrease of antigen-independent (-dependent) expansion rate  $r_A$  ( $p_A$ ) is compensated by an increase in the antigen-dependent (-independent) expansion rate  $p_A$  ( $r_A$ ). Conversely, the increase in the subvirus:virus ratio  $\theta$  requires an increase in the antibody's carrying capacity,  $A_m$ , for the clearance to be preserved (Fig. S2).

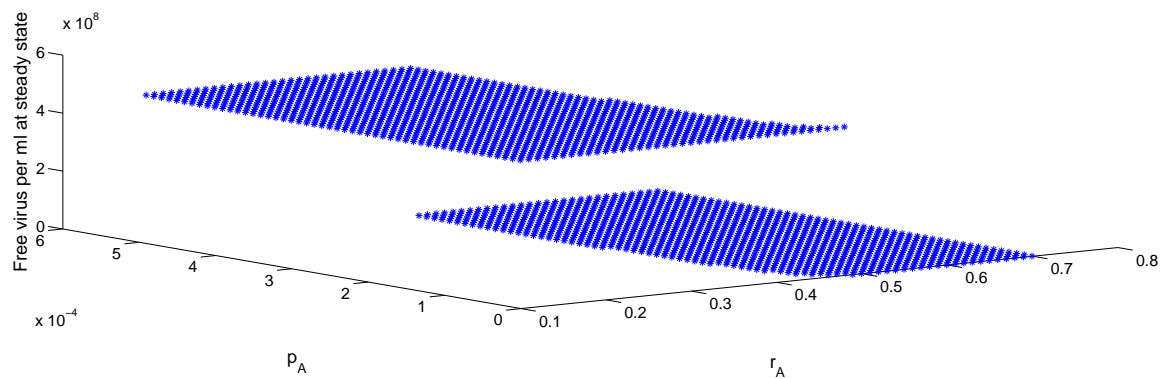

Figure S1: Stable steady state solutions for free virus,  $V$ , as given by model (7), as a function of  $r_A$  and  $p_A$  for  $\theta = 10^3$ ,  $A_0 = 0$ . The other parameters are as Tables 1 and 2 (median values).

---

<sup>¶</sup>Corresponding author

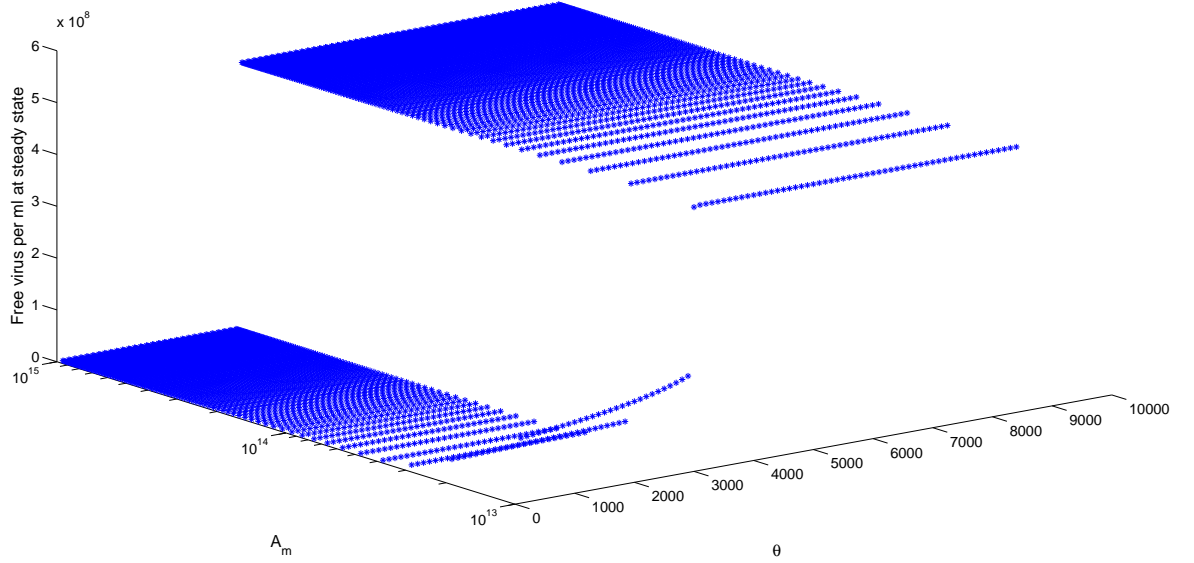

Figure S2: Stable steady state solutions for free virus,  $V$ , as given by model (7), as a function of  $\theta$  and  $A_m$  for  $\theta = 10^3$ ,  $A_0 = 0$ . The other parameters are as in Tables 1 and 2 (median values).

We derived the sensitivity equations for model (7) with respect to  $q = \{r_A, p_A\}$  by formally differentiating each equation with respect to  $q$ . The resulting curves  $q \frac{dV}{dq}$  give the effect on  $V$  when  $q$  is doubled [1]. We see that the effects of  $p_A$  and  $r_A$  are proportional with each other throughout the infection (see Fig. S3).

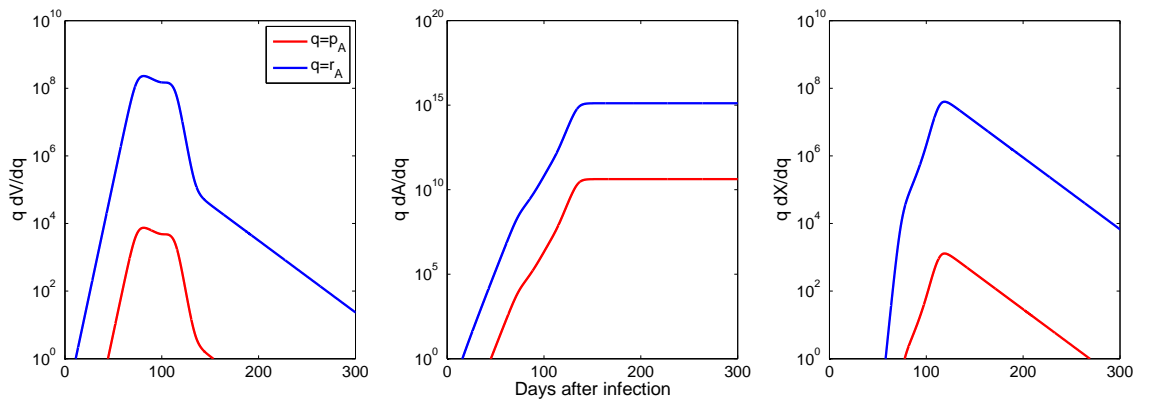

Figure S3: The relative sensitive curves  $q \frac{dZ}{dq}$  for  $q = p_A$  (red lines) and  $q = r_A$  (blue lines) and  $Z = V$  (left panel),  $Z = A$  (middle panel),  $Z = X$  (right panel). The parameters are as in Tables 1 and 2 (median values).

Model (7) assumes that the clearance rate of the virions bound to antibodies is four times higher than the clearance of the virus, *i.e.*,  $c_{AV} = 4c$  as in HIV infections [2]. Since the HIV is cleared more rapidly than HBV, the  $c_{AV}$  to  $c$  ratios may be underestimated. We examined the effects of increasing  $c_{AV}$  beyond  $4c$  on the free virus population when we are in the clearance region given by equation (19) and  $A_5 > \Gamma$  in the main text. As seen in Fig. S4 increasing the clearance of subviral particles reduces the free virus concentration during the second phase decay. In particular, for  $c_{AV} = 150c$  (Fig. S4 dotted line) the free virus during the second phase decay is 6.5-times lower than in the  $c_{AV} = 4c$  case (Fig. S4 solid line).

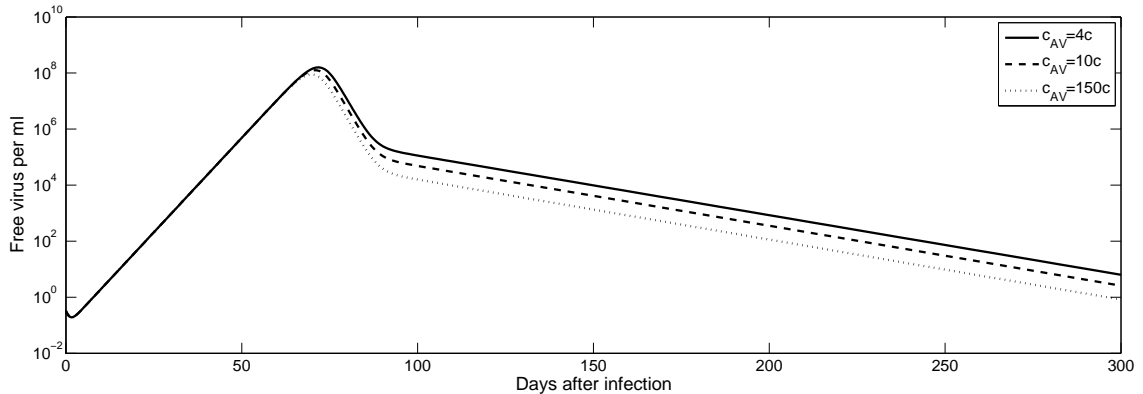

Figure S4: Free virus dynamics as given by model (7) for  $c_{AV} = 4c$  (solid line),  $c_{AV} = 10c$  (dashed line) and  $c_{AV} = 150c$  (dotted line).  $\theta = 10^3$ ,  $A_0 = 0$ ,  $r_A = 0.5$ , and the other parameters are as Tables 1 and 2 (median values).

## References

- [1] Bortz D, Nelson P (2004) Sensitivity analysis of a nonlinear lumped parameter model of HIV infection dynamics. *Bull Math Biol* 66:1009–1026.
- [2] Igarashi T, Brown C, Azadegan A, Haigwood N, Dimitrov D, et al. (1999) Human immunodeficiency virus type 1 neutralizing antibodies accelerate clearance of cell-free virions from blood plasma. *Nat Med* 5:211–216.

Table S1: Patient data

| patient | Days | HBV DNA per ml      |
|---------|------|---------------------|
| 1       | 101  | $7.22 \times 10^8$  |
|         | 107  | $6.15 \times 10^9$  |
|         | 116  | $6.37e \times 10^9$ |
|         | 117  | $6.69 \times 10^9$  |
|         | 121  | $2.16 \times 10^9$  |
|         | 128  | $1.58 \times 10^8$  |
|         | 137  | $2.32 \times 10^5$  |
|         | 145  | $6.79 \times 10^4$  |
|         | 153  | $4.52 \times 10^4$  |
|         | 159  | $4.8 \times 10^2$   |
|         | 188  | 390                 |

| patient | Days               | HBV DNA per ml     |
|---------|--------------------|--------------------|
| 2       | 36                 | $7.41 \times 10^6$ |
|         | 48                 | $4.16 \times 10^8$ |
|         | 60                 | $6.82 \times 10^8$ |
|         | 69                 | $4.16 \times 10^8$ |
|         | 70                 | $2.59 \times 10^8$ |
|         | 72                 | $2.01 \times 10^8$ |
|         | 73                 | $1.53 \times 10^8$ |
|         | 74                 | $1.44 \times 10^8$ |
|         | 76                 | $1.37 \times 10^8$ |
|         | 78                 | $5.35 \times 10^7$ |
|         | 79                 | $1.09 \times 10^8$ |
|         | 80                 | $6.31 \times 10^8$ |
|         | 81                 | $5.33 \times 10^7$ |
|         | 85                 | $1.55 \times 10^7$ |
|         | 86                 | $5.70 \times 10^7$ |
|         | 87                 | $1.81 \times 10^7$ |
|         | 93                 | $4.21 \times 10^5$ |
|         | 95                 | $2.52 \times 10^5$ |
|         | 103                | $1.30 \times 10^5$ |
|         | 105                | $7.27 \times 10^4$ |
|         | 118                | $7.78 \times 10^4$ |
|         | 123                | $6.61 \times 10^4$ |
|         | 140                | $8.52 \times 10^3$ |
| 155     | $1.40 \times 10^3$ |                    |
| 167     | $3.20 \times 10^3$ |                    |

| patient | Days | HBV DNA per ml     |
|---------|------|--------------------|
| 3       | 108  | $3.27 \times 10^8$ |
|         | 120  | $2.25 \times 10^7$ |
|         | 127  | $4.85 \times 10^7$ |
|         | 161  | $3.69 \times 10^4$ |
|         | 193  | $4.40 \times 10^5$ |
|         | 205  | $7.68 \times 10^3$ |
|         | 275  | $9.20 \times 10^3$ |

| patient | Days | HBV DNA per ml     |
|---------|------|--------------------|
| 4       | 93   | $1.11 \times 10^9$ |
|         | 106  | $7.24 \times 10^7$ |
|         | 110  | $2.66 \times 10^7$ |
|         | 117  | $6.06 \times 10^6$ |
|         | 134  | $1.05 \times 10^5$ |
|         | 151  | $1.99 \times 10^4$ |
|         | 165  | $8.40 \times 10^2$ |
|         | 190  | $1.12 \times 10^3$ |
|         | 213  | 390                |
|         | 226  | 390                |

| patient | Days | HBV DNA per ml     |
|---------|------|--------------------|
| 5       | 66   | $6.78 \times 10^7$ |
|         | 80   | $3.58 \times 10^8$ |
|         | 96   | $1.16 \times 10^9$ |
|         | 110  | $9.61 \times 10^7$ |
|         | 123  | $1.35 \times 10^6$ |
|         | 143  | $7.66 \times 10^4$ |
|         | 172  | $1.99 \times 10^4$ |
|         | 195  | $3 \times 10^3$    |
|         | 240  | $1.6 \times 10^3$  |

| patient | Days               | HBV DNA per ml     |
|---------|--------------------|--------------------|
| 6       | 99                 | $1.4 \times 10^8$  |
|         | 114                | $2.05 \times 10^9$ |
|         | 116                | $4 \times 10^9$    |
|         | 118                | $1.82 \times 10^9$ |
|         | 120                | $2.12 \times 10^9$ |
|         | 122                | $9.65 \times 10^8$ |
|         | 127                | $1.25 \times 10^9$ |
|         | 129                | $2.87 \times 10^8$ |
|         | 132                | $1.88 \times 10^8$ |
|         | 134                | $1.74 \times 10^8$ |
|         | 136                | $1.11 \times 10^8$ |
|         | 140                | $1.15 \times 10^8$ |
|         | 143                | $4.26 \times 10^7$ |
|         | 145                | $3.95 \times 10^7$ |
|         | 149                | $2.59 \times 10^7$ |
|         | 151                | $3.34 \times 10^7$ |
|         | 157                | $1.35 \times 10^7$ |
|         | 159                | $4.73 \times 10^6$ |
|         | 161                | $4.58 \times 10^6$ |
|         | 163                | $1.76 \times 10^5$ |
| 171     | $1.14 \times 10^4$ |                    |
| 174     | $2.62 \times 10^4$ |                    |
| 177     | $1.95 \times 10^4$ |                    |
| 181     | $1.30 \times 10^4$ |                    |
| 186     | $6.60 \times 10^3$ |                    |
| 198     | $4.48 \times 10^3$ |                    |
| 280     | $1.22 \times 10^4$ |                    |

| patient | Days               | HBV DNA per ml     |
|---------|--------------------|--------------------|
| 7       | 95                 | $6.86 \times 10^9$ |
|         | 105                | $5.66 \times 10^9$ |
|         | 120                | $5.77 \times 10^9$ |
|         | 122                | $6.10 \times 10^9$ |
|         | 124                | $9.15 \times 10^9$ |
|         | 126                | $7.37 \times 10^9$ |
|         | 128                | $1.43 \times 10^9$ |
|         | 133                | $1.43 \times 10^9$ |
|         | 135                | $9.50 \times 10^9$ |
|         | 137                | $7.53 \times 10^8$ |
|         | 150                | $1.94 \times 10^9$ |
|         | 153                | $3.03 \times 10^8$ |
|         | 155                | $3.81 \times 10^9$ |
|         | 157                | $6.87 \times 10^8$ |
|         | 159                | $1.91 \times 10^8$ |
|         | 161                | $5.86 \times 10^7$ |
|         | 165                | $1.22 \times 10^8$ |
|         | 169                | $5.80 \times 10^7$ |
|         | 172                | $4.85 \times 10^7$ |
|         | 174                | $2.10 \times 10^7$ |
|         | 179                | $1.46 \times 10^7$ |
|         | 181                | $2.49 \times 10^6$ |
|         | 190                | $1.38 \times 10^7$ |
|         | 222                | $3.44 \times 10^6$ |
|         | 223                | $2.32 \times 10^6$ |
|         | 226                | $4.33 \times 10^6$ |
| 234     | $1.81 \times 10^6$ |                    |
| 240     | $2.79 \times 10^6$ |                    |
| 263     | $3.16 \times 10^6$ |                    |
